# Supplementary material for: Taxonomic and systematic revisions to the North American Nimravidae (Mammalia, Carnivora)
Source: PeerJ. 2016 Feb 9;4:e1658. doi: 10.7717/peerj.1658 (PMC4756750; doi:10.7717/peerj.1658)
Supplement: Supplemental Information 3 [file peerj-04-1658-s003.xlsx]

## Sheet: Sheet1
Specimen #	Taxon	Cranial Length (mm)	Post Canine Diastema Length (mm)	Palate Length (mm)	Lambdoid Crest Angle (°)	Genial Flange Height (mm)	Dentary Length (mm)	Canine Length (mm)	Canine Width (mm)	Serration Density (serr./mm)	P3 Height (mm)	P4 Height (mm)	Trigonid Length (mm)	m1 Length (mm)	Humerus Length (mm)	Tibia Length (mm)	Femur Length (mm)
AMNH 6930*	Archaelurus debilis	173	15.11	73.73	140	?	?	13.16	8.42	?	11.62	13.61	20.18	24.09	?	?	?		Measurement data utilized in species comparisons. Asterisks (*) equate to type specimens, blue text refers to measurements based upon the canine alveolus, while red text are measurements taken at the maxillary border.
AMNH 5335*	Daptophilus squalidens	?	?	?	?	?	?	9.5	3.89	4.8	?	?	13.92	17.96	?	?	?
YPM 10518*	Dinaelurus crassus	174	9.5	81	125.7	?	?	15.5	11	?	?	?	?	?	?	?	?
YPM PU 10502*	Dinictis bombifrons	?	?	?	144	44.82	138.44	16.99	8.31	4.8	9.73	12.04	16.28	19	?	?	?
AMNH 6937*	Dinictis cyclops	128.38	10.35	60.35	132	?	?	12.17	6.79	?	7.96	10.78	?	?	?	?	?
USNM 25146*	Dinictis eileenae	?	?	?	?	?	?	?	?	?	?	?	20.74	23.92	?	?	?
SDSM 28145	Dinictis felina	?	?	?	?	?	?	?	?	3.5	?	?	?	?	?	?	?
SDSM 293	Dinictis felina	135	11.67	64.04	?	?	?	14.78	8.04	?	?	?	?	?	?	?	?
SDSM 2564	Dinictis felina	126	?	?	130	22.41	104.03	12.92	7.59	?	9.04	10.82	?	?	?	?	?
SDSM 2882	Dinictis felina	?	?	?	?	?	?	?	?	?	?	?	15.82	18.87	?	?	?
56858	Dinictis felina	?	?	?	?	?	?	?	?	3.4	?	?	15.55	18.63	?	?	?
SDSM 56140	Dinictis felina	?	12.71	68.86	?	?	?	?	?	?	9.88	13.11	?	?	?	?	?
SDSM 5311	Dinictis felina	169	?	?	140	30.34	133.32	15.5	6.47	3.4	9.83	12.1	15.29	18.96	?	?	?
SDSM 2416	Dinictis felina	157	12.97	71	130	32.57	126.4	14.19	9.7	?	9.82	13.83	14.19	18.39	170	177	200
SDSM 69261	Dinictis felina	?	?	?	?	22.63	101.22	?	?	4.3	9.31	10.93	13.16	15.83	?	?	?
SDSM 2663	Dinictis felina	158	13.6	66.88	139	30.93	127.07	15.43	7.24	3.5	10.77	14.97	16.05	19.37	?	?	?
UNSM 26607	Dinictis felina	?	?	?	?	26.69	110.66	?	?	?	?	?	?	?	?	169	187
UNSM 279-51	Dinictis felina	131.66	?	?	137	?	?	9.81	6.63	?	?	?	?	?	?	?	?
UNSM 26402	Dinictis felina	170	?	?	138	?	?	?	?	?	10.76	13	?	?	?	?	?
UNSM 25512	Dinictis felina	129	10.35	58	130	?	?	13.28	7.75	?	?	?	?	?	?	?	?
AMNH 1399	Dinictis felina	182	15.05	79	131	32.82	133.34	15.21	8.71	2.8	?	?	?	?	?	?	?
AMNH 455*	Dinictis felina	139	11.32	66.23	131	31.98	120.98	15.03	10.24	?	10.35	12.37	16.25	18.93	?	?	?
AMNH 8777	Dinictis felina	145	13.08	62.71	134	34.35	120.46	13.64	6.72	3.3	9.76	10.75	15.38	18.29	?	?	?
AMNH 38805	Dinictis felina	142	12.47	62.33	142	33.11	116.47	13.47	7.09	3.3	10.23	12.39	14.31	17.34	169	174	194
FAM 104823	Dinictis felina	111.59	?	?	140	?	?	?	?	?	8.4	11.64	14.34	17.38	?	?	?
FAM 62074	Dinictis felina	130.09	12.72	62.46	?	28.82	114.25	12.86	7.51	3.4	9.31	12.33	14.04	16.9	149	163	177
FAM 62070	Dinictis felina	130	10.16	57.89	?	24.55	108.3	?	?	?	10.98	12.57	14.9	17.72	?	?	?
FAM 62073	Dinictis felina	135	14.08	62.6	?	27.41	109.46	?	?	?	10.01	11.93	16.41	19.77	?	?	?
FAM 125655	Dinictis felina	148	?	?	146	?	?	?	?	4.2	9.81	11.77	14.77	17.79	?	?	?
LUSK 0143-3052	Dinictis felina	145	?	?	148	36.33	125.53	?	?	3.7	9.86	12.11	?	?	?	?	?
FAM 69403	Dinictis felina	?	?	?	137	29.36	106.61	?	?	?	9.32	10.22	?	?	?	?	?
FAM 125651	Dinictis felina	135	11.09	57.18	146	?	?	?	?	3.6	9.88	12.33	?	?	?	?	?
YPM 56858	Dinictis felina	168	?	?	141	37.67	136.25	?	?	?	?	?	?	?	182	?	?
YPM PU 10972	Dinictis felina	150	?	?	139	33.89	132.92	?	?	2.8	8.8	11.28	?	?	?	?	?
YPM PU 12536	Dinictis felina	152	?	?	131	?	?	15.54	9.07	?	9.97	10.53	?	?	?	?	?
YPM PU 12558	Dinictis felina	?	10.95	64.05	?	?	?	13.93	6.54	3.3	9.81	11.22	13.01	16.21	?	?	?
YPM PU 12577	Dinictis felina	?	?	?	?	27.86	111.62	?	?	?	?	?	13.78	16.42	159	163	182
YPM PU 13798	Dinictis felina	154	12.6	70.18	141	?	?	14.2	7.31	?	10.62	11.64	14.69	17.95	?	?	?
YPM PU 13582	Dinictis felina	149	14.49	66.28	142	?	?	14.2	7.89	?	?	?	14.73	17.73	?	?	?
YPM PU 12751	Dinictis felina	?	17	72.69	?	?	?	13.16	7.09	3.5	?	12.08	15.97	17.91	?	?	?
YPM PU 12698	Dinictis felina	?	?	?	?	29.26	112.04	?	?	?	?	?	14.74	17.65	?	?	?
YPM PU 11379	Dinictis felina	122	?	?	138	21.97	100	?	?	?	10.21	11.73	?	?	?	?	?
YPM PU 12573	Dinictis felina	?	?	?	?	?	?	?	?	3.8	8.17	9.88	13.47	16.27	?	?	?
YPM PU 13587	Dinictis felina	121.74	11.39	57.91	144	25.05	95.83	10.58	4.86	4.2	?	?	13.54	16.47	?	?	?
YPM PU 13795	Dinictis felina	130	12.57	61.03	138	?	?	12.61	7.11	?	?	?	?	?	?	?	?
YPMPU 13625	Dinictis felina	?	?	?	?	?	?	?	?	3.4	8.7	11.45	?	?	157	169	185
YPM PU 21452	Dinictis felina	?	?	?	?	?	?	13.89	7.14	?	10.69	12.8	16.28	20.17	?	?	?
USNM 18219	Dinictis felina	?	?	?	?	?	?	?	?	?	?	?	?	?	?	188	216
USNM 15889	Dinictis felina	114	?	?	?	?	?	?	?	?	10.48	11.14	15.14	18.61	?	?	?
USNM 15890	Dinictis felina	?	?	?	?	33.06	132.01	?	?	3.4	10.88	12.03	15.43	18.75	?	?	?
USNM 18182	Dinictis felina	123	?	?	140	?	?	?	?	?	?	?	?	?	?	?	?
BADL 30677	Dinictis felina	?	?	?	?	?	?	11.87	6.91	3.4	9.62	12.65	?	?	?	?	?
USNM 3957*	Dinictis major	?	14.39	73.31	?	?	?	14.8	7.94	2.2	11.76	12.16	19.73	23.03	?	191	227
SDSM 54247*	Ekgmoitepecela olsontau	?	?	?	?	?	?	?	?	?	?	?	14.09	15.46	?	?	?
AMNH 6941*	Eusmilus cerebralis	100	11.17	57.46	91.5	?	?	13.85	6.21	?	?	?	?	?	?	?	?
FAM 98189	Eusmilus cerebralis	96.87	12.28	47.57	94.1	?	80.44	10.5	4.24	?	2.7	7.74	10.47	11.43	?	?	?
FAM 69377	Eusmilus cerebralis	?	?	?	92	59.89	82	?	?	?	?	?	?	?	?	?	?
AMNH 98770	Eusmilus cerebralis	96.85	14.06	49.13	113	?	?	11.29	6.54	6.2	?	?	12.55	13.15	?	?	?
FAM 98769	Eusmilus cerebralis	?	?	?	103	?	?	?	?	?	?	?	?	?	?	?	?
AMNH 102375*	Hoplophoneus belli	94	14.86	41.12	?	?	?	7.18	3.47	?	4.38	9.88	?	?	?	?	?
UNSM 1068	Hoplophoneus dakotensis	?	?	?	?	?	?	34.78	15.44	?	?	?	?	?	?	?	?
YPM PU 11079*	Hoplophoneus dakotensis	?	?	?	?	77.93	175	?	?	?	?	?	21.61	23.26	?	?	?
YPM 10050*	Hoplophoneus latidens	152	16.42	72.25	121	?	?	?	?	?	?	?	?	?	?	?	?
YPM 10049*	Hoplophoneus marshi	?	5.59	62.49	?	?	?	13.29	6.58	4.7	7.44	13.68	?	?	?	?	?
UNSM 1070	Hoplophoneus mentalis	165	16.04	77.66	128	49.87	135.64	14.44	8.53	4.1	?	?	18.6	21.98	?	?	?
UNSM 20-14-8-34 SP	Hoplophoneus mentalis	136	?	?	126	?	?	?	?	?	6.59	12.81	?	?	?	?	?
FAM 69427	Hoplophoneus mentalis	155	?	?	129	42.31	133.35	?	?	?	9.64	16.3	16.24	18.5	169	158	200
YPM PU 13635	Hoplophoneus mentalis	162	?	?	?	51.8	136.06	?	?	?	?	?	?	?	176	?	?
YPM PU 12515*	Hoplophoneus mentalis	?	?	?	?	62.19	145.35	?	?	?	?	?	?	?	?	?	?
YPM PU 11256	Hoplophoneus mentalis	?	?	?	?	?	?	20.86	9.76	5.1	?	?	?	?	185	?	?
USNM 362744	Hoplophoneus mentalis	180	?	?	97	59	137.78	?	?	?	?	?	?	?	?	?	?
YPM 10052*	Hoplophoneus molossus	129	13.99	63.6	130	35.58	111.83	14.26	7.24	2.9	?	?	?	?	?	?	?
UNSM 322-51	Hoplophoneus occidentalis	230	31.57	109.26	109	?	?	24.14	11.8	4.1	?	?	?	?	?	?	?
FAM 62075	Hoplophoneus occidentalis	?	?	?	?	?	?	?	?	?	?	?	?	?	?	215	276
FAM 102387	Hoplophoneus occidentalis	242	12.64	116.07	118	?	?	25.89	?	?	?	?	?	?	?	?	?
DICK 33-1370	Hoplophoneus occidentalis	?	?	?	?	83	178	?	?	?	?	?	22.32	24.15	?	?	?
FAM 62025	Hoplophoneus occidentalis	223	20	111	114	?	?	?	?	?	?	?	19.72	20.08	?	?	?
AMNH 1407	Hoplophoneus occidentalis	?	?	?	?	67.56	170	?	?	?	?	?	?	?	214	207	260
SDSM 2417*	Hoplophoneus oharrai	187	19.64	86.66	122	72.25	144.1	19.2	8	?	?	?	17.62	19.42	175	146	194
AMNH 62022	Hoplophoneus primaevus	177	14.25	94	117	?	?	18.09	9.44	?	?	?	?	?	?	?	?
SDSM 5946	Hoplophoneus primaevus	130	?	?	115	?	?	?	?	?	7.69	12.28	?	?	?	?	?
SDSM 28153	Hoplophoneus primaevus	144	16.86	67.65	107	39.07	118.28	12.08	7.8	4.4	7.2	9.44	14.95	16.7	?	?	?
SDSM 3666	Hoplophoneus primaevus	151	11.24	70.17	119	?	?	16.1	7.84	?	8.33	12.21	?	?	?	?	?
SDSM 2687	Hoplophoneus primaevus	155	15.48	74	109	?	?	?	?	?	?	?	?	?	?	?	?
SDSM 68878	Hoplophoneus primaevus	168	18.36	80.26	?	?	?	17.39	8.85	?	8.03	14.21	?	?	?	?	?
SDSM 6939	Hoplophoneus primaevus	173	16.38	91	110	?	?	?	?	?	7.56	15.01	?	?	?	?	?
SDSM 536	Hoplophoneus primaevus	?	14.97	69.08	?	?	?	13.7	7.83	?	?	?	?	?	?	?	?
SDSM 2641	Hoplophoneus primaevus	155	12.59	72.66	?	?	?	14.5	8.94	4.6	?	?	?	?	?	?	?
SDSM 2661	Hoplophoneus primaevus	?	?	?	124	?	?	?	?	?	8.32	9.45	?	?	?	?	?
SDSM 28139	Hoplophoneus primaevus	145	11.16	70.16	114	?	?	?	?	?	8.53	13.85	?	?	?	?	?
SDSM 69054	Hoplophoneus primaevus	?	?	?	?	52.86	135.65	?	?	?	?	?	17.19	19.21	?	?	?
CP 5095	Hoplophoneus primaevus	125	?	?	111	?	?	?	?	?	7.3	11.3	?	?	?	?	?
SDSM 2528	Hoplophoneus primaevus	157	10.96	84	115	45.84	132.76	13.77	7.44	?	7.33	11.02	15.89	18.15	150	137	188
SDSM 2662	Hoplophoneus primaevus	139.25	10.95	72.74	125	?	?	?	?	4.9	8.62	15.3	?	?	?	?	?
SDSM 2544	Hoplophoneus primaevus	154	14.34	73.14	116	45.51	124.46	14.69	7.89	4.7	7.8	14.72	17.72	18.68	?	?	?
UNSM 48454	Hoplophoneus primaevus	?	?	?	?	41.5	113.26	13.28	6.71	3.5	?	?	17.56	18.77	139.33	?	?
UNSM 1072	Hoplophoneus primaevus	144	?	?	118	42.91	115.48	?	?	4.2	7.9	12.35	?	?	170	?	?
UNSM 27007	Hoplophoneus primaevus	163	16.48	79.23	119	?	?	18.52	9.35	?	?	?	?	?	?	?	?
UNSM 2-4-8-33NP	Hoplophoneus primaevus	142.67	15.82	66.98	115	?	?	?	?	?	?	?	?	?	?	?	?
UNSM 25492	Hoplophoneus primaevus	161	?	?	108	?	?	?	?	?	?	?	?	?	?	?	?
UNSM 25506	Hoplophoneus primaevus	159	?	?	116	?	?	15.76	7.75	3.8	?	?	?	?	?	?	?
AMNH 38980	Hoplophoneus primaevus	136.2	11.93	64.21	117	?	?	11.95	6.07	4.8	?	?	13.05	15.25	132.42	123	158
AMNH 38951	Hoplophoneus primaevus	168	14.84	80.4	116	45.15	132.51	16.1	8.35	6.2	6.88	12.75	?	?	169	157	195
AMNH 39101	Hoplophoneus primaevus	162	20.2	71.55	123	52.61	140.33	17.89	8.34	4.1	?	?	17.49	19.78	?	?	?
AMNH 9764	Hoplophoneus primaevus	121	?	?	119	?	?	?	?	?	8.24	13.27	16.38	17.7	?	?	?
AMNH 38982	Hoplophoneus primaevus	142	11.17	64.54	131	?	?	?	?	?	?	?	?	?	?	?	?
FAM 69370	Hoplophoneus primaevus	147	16.68	72.58	118	47.7	121.91	14.12	8.55	?	7.92	12	?	?	?	?	?
AMNH 38981	Hoplophoneus primaevus	168	14.43	79.94	115	47	130.63	16.2	8.43	4.6	6.94	12.05	?	?	170	?	?
FAM 125657	Hoplophoneus primaevus	155	?	?	123	44.4	122.19	11.8	7.08	3.9	7.14	10.31	?	?	?	?	?
FAM 62077	Hoplophoneus primaevus	167	19.42	80.5	116	49.53	137.73	13.93	8.49	4.1	7.47	13.5	16.88	19.31	162	159	200
FAM 125658	Hoplophoneus primaevus	150	12.05	71.55	112	45.77	125.02	?	?	4.6	9.25	14.93	18.74	19.6	?	?	?
FAM 62125	Hoplophoneus primaevus	157	14.59	76.36	97	48.16	124.02	?	?	4.3	6.99	12.48	?	?	?	159	189
FAM 69420	Hoplophoneus primaevus	152	17.34	71.47	?	42.84	129.22	14.26	7.26	4.7	7.59	11.28	14.69	16.26	?	?	?
FAM 125662	Hoplophoneus primaevus	151	10.72	71.22	111	?	?	13.33	6.43	?	10.74	15.41	?	?	?	?	?
FAM 125675	Hoplophoneus primaevus	175	17.35	79.8	120	?	?	?	?	5.1	9.25	14.38	?	?	179	?	?
FAM 62091	Hoplophoneus primaevus	150	?	?	127	?	?	?	?	3.9	?	?	15.06	16.25	?	?	?
FAM 62084	Hoplophoneus primaevus	142	?	?	133	42.37	113.39	13.09	6.56	3.9	7.25	12.64	16.6	18.47	?	?	?
FAM 69424	Hoplophoneus primaevus	156	17.33	77.8	113	?	?	13.46	8.38	?	7.55	12.41	?	?	?	?	?
FAM 125660	Hoplophoneus primaevus	136	?	?	116	38.7	113.36	?	?	4.3	8.17	15.22	?	?	?	?	?
FAM 62007	Hoplophoneus primaevus	152	?	?	130	38.7	118.11	?	?	?	7.67	13.63	16.54	18.2	?	?	?
YPM PU 11372	Hoplophoneus primaevus	179	20.3	82.43	122	?	?	17.62	8.57	?	8.2	13.19	?	?	?	?	?
YPM PU 13628	Hoplophoneus primaevus	142	?	?	117	37.94	107.97	?	?	3.9	5.76	11.09	?	?	140	135	175
YPM PU 12750	Hoplophoneus primaevus	145	14.68	70.18	120	49.07	116.06	14.82	?	4.2	?	?	14.51	15.9	145	145	170
YPM PU 14999	Hoplophoneus primaevus	128	10.64	60.62	119	?	?	12.63	6.66	4.8	7.07	12.29	?	?	?	?	?
YPM PU 12957	Hoplophoneus primaevus	180	18.09	83.51	110	?	?	16.5	10.22	?	?	?	?	?	171	?	?
YPM PU 10515	Hoplophoneus primaevus	?	13.38	58.82	113	?	?	11.29	6.72	4.1	?	?	?	?	?	?	?
YPM 10051	Hoplophoneus primaevus	?	14.36	64.1	119	40.59	107.68	12.62	7.71	?	?	?	14.61	15.46	?	?	?
YPM PU 10741	Hoplophoneus primaevus	?	?	?	?	?	?	?	?	?	?	?	?	?	154	145	189
YPM PU 12749	Hoplophoneus primaevus	163	18.1	77.89	113	44.05	130.06	13.09	7.52	?	?	?	15.25	16.65	?	?	?
YPM PU 12542	Hoplophoneus primaevus	140	12.49	64.41	115	?	?	?	?	?	?	?	14.25	15.38	?	?	?
YPM PU 12590	Hoplophoneus primaevus	177	17.37	82.5	124	59.11	144.47	?	?	?	?	?	?	?	184	?	?
YPM PU 12750 A	Hoplophoneus primaevus	152	16.14	70.25	110	?	?	14.28	7.61	4.6	?	?	?	?	148	?	?
YPM PU 13136	Hoplophoneus primaevus	151	?	?	113	38.38	127.94	?	?	4.9	7.56	11.83	?	?	?	?	?
USNM 16812	Hoplophoneus primaevus	165	?	?	124	?	?	?	?	?	?	?	?	?	?	?	?
USNM 18187	Hoplophoneus primaevus	?	?	?	?	?	?	?	?	?	7.61	13.71	?	?	?	?	?
USNM 18193	Hoplophoneus primaevus	131	?	?	111	?	?	?	?	?	7.89	13.24	?	?	?	?	?
USNM 18191	Hoplophoneus primaevus	142	11.73	71.6	115	40.6	114.47	14.46	6.79	?	8.06	11.61	17.21	18.99	?	?	?
USNM 18189	Hoplophoneus primaevus	162	21.07	81.08	123	?	?	?	?	4.2	?	?	17.39	19.07	?	?	?
USNM 18181	Hoplophoneus primaevus	?	?	?	?	?	?	?	?	5.1	?	?	?	?	?	?	?
USNM 15891	Hoplophoneus primaevus	157	?	?	115	48.75	130.53	?	?	?	?	?	?	?	?	?	?
USNM 18203	Hoplophoneus primaevus	145	?	?	120	51.49	119.29	?	?	?	?	?	?	?	?	?	?
USNM 18185	Hoplophoneus primaevus	?	?	?	112	?	?	?	?	3.9	?	?	?	?	175	?	?
USNM 15912	Hoplophoneus primaevus	?	?	?	106	44.76	118.02	15.53	7.29	?	?	?	?	?	148	140	177
USNM 15951	Hoplophoneus primaevus	163	?	?	115	?	?	?	?	?	?	?	?	?	?	?	?
USNM 18190	Hoplophoneus primaevus	150	15.27	70.37	114	42.75	111.64	14.43	7.32	?	8.08	13.11	16.79	18.67	?	?	?
USNM 18183	Hoplophoneus primaevus	?	?	?	119	37.14	124	?	?	?	?	?	?	?	?	?	?
USNM 15926	Hoplophoneus primaevus	139	?	?	117	?	?	?	?	?	?	?	?	?	?	?	?
USNM 18192	Hoplophoneus primaevus	159	?	?	112	?	?	?	?	?	?	?	?	?	?	?	?
USNM 18194	Hoplophoneus primaevus	150	?	?	?	?	?	15.48	6.6	4.5	?	?	?	?	?	?	?
VHVP 735	Hoplophoneus primaevus	170	17.78	79.18	114	?	?	15.33	8.48	4.4	8.2	11.42	?	?	?	?	?
USNM 15902	Hoplophoneus primaevus	153	14.36	71.78	117	?	?	16.72	9.83	?	?	?	?	?	?	?	?
USNM 100	Hoplophoneus primaevus	?	?	?	?	46.49	128.83	?	?	4.8	?	?	?	?	?	?	?
USNM 15925	Hoplophoneus primaevus	173	12.98	80.68	113	?	?	15.54	7.62	?	?	?	?	?	?	?	?
USNM 99*	Hoplophoneus primaevus	154	18.78	75.76	118	?	?	14.8	9.14	?	7.34	11.96	18.61	19.98	?	?	?
BADL 10593	Hoplophoneus primaevus	141	?	?	118	33.26	114.11	?	?	?	?	?	?	?	?	?	?
BADL 59734	Hoplophoneus primaevus	151	15	76.49	113.2	?	?	13.61	8.46	?	7.87	13.08	?	?	?	?	?
BADL 4893	Hoplophoneus primaevus	155	18.78	75.23	109.5	43.2	118.48	13.38	8.08	4.4	7.3	10.41	17.1	18.72	?	?	?
BADL 59490	Hoplophoneus primaevus	162	19.08	71.05	111	52.24	?	16.15	7.27	4.6	?	?	?	?	?	?	?
YPM PU 12972	Hoplophoneus primaevus	175	?	?	126	?	?	?	?	3.7	8.11	16.03	?	?	?	?	?
YPM PU 10647	Hoplophoneus primaevus	160	?	?	109	?	?	?	?	4.7	?	?	?	?	179	?	?
YPM PU 12953 A*	Hoplophoneus sicarius	189	20.46	91.81	95.8	87.95	162	28.24	4.29	?	4.56	11.42	17.05	18.78	?	?	?
UNSM 25505	Nanosmilus kurteni	107	7.19	49	120	25.28	85.41	?	?	?	7.04	11.68	13.12	15.08	?	?	?
SDSM 55280	Nimravus brachyops	?	?	?	?	?	?	20.11	11.4	?	15.85	17.45	21.94	25.42	?	?	?
SDSM 521	Nimravus brachyops	?	?	?	?	?	?	?	?	2.2	11.75	13.32	?	?	?	?	?
SDSM 5776	Nimravus brachyops	?	?	?	?	?	?	?	?	?	?	?	18.83	22.5	?	?	?
SDSM 15012	Nimravus brachyops	159	?	?	136	?	?	?	?	?	15.58	16.12	21.2	24.06	?	?	?
SDSM 348*	Nimravus bumpensis	164	16.44	84	135	?	?	13.58	7.41	?	13.86	14.79	18.2	23.45	?	?	?
FAM 62151	Nimravus brachyops	188	17.75	78	146	?	?	16.57	9.01	?	?	?	19.55	23.16	228	250	275
AMNH 6931	Nimravus brachyops	173	15.08	69.93	135	?	?	12.64	7.21	?	10.94	11.27	?	?	?	?	?
YPM 10045	Nimravus brachyops	189	15.97	78.81	139	?	?	14.01	8.26	?	14.58	14.46	21.71	25.21	?	?	?
YPM 1044	Nimravus brachyops	194	20.17	85.42	133	?	?	15.77	9.19	?	12.27	13.79	22.11	24.6	?	?	?
YPM 10517	Nimravus brachyops	190	17.39	77.76	143	?	?	17.35	10.03	2.3	13.52	13.4	23.5	27.14	?	?	?
YPM 10046	Nimravus brachyops	163	11.16	65	136	?	?	13.91	7.67	?	14.76	15.11	?	?	?	?	?
YPM 14388	Nimravus brachyops	?	?	?	?	?	?	?	?	?	14.06	13.98	19.8	23.85	?	?	?
YPM 10519	Nimravus brachyops	?	13.46	62.01	?	?	?	12.15	7.47	?	11.1	11.94	?	?	?	?	?
YPM 14385	Nimravus brachyops	?	?	?	?	?	?	?	?	?	?	?	19.63	22.95	?	?	?
AMNH 6936*	Nimravus confertus	?	?	?	?	?	?	?	?	?	?	?	19	22.54	?	?	?
AMNH 6933*	Nimravus gomphodus	200	14.97	?	139	?	?	15.33	8.32	2.2	14.24	16.54	19.09	24.14	?	?	?
AMNH 12882*	Nimravus sectator	?	?	?	?	?	?	?	?	?	?	?	24.27	28.39	?	?	?
YPM 10053*	Pogonodon cismontanus	?	?	?	?	49	178	?	?	?	?	?	19.54	23.4	?	?	?
SDSM 2865	Pogonodon davisi	?	?	?	?	52.31	155	?	?	?	?	?	19.38	23.22	?	?	?
AMNH 102156*	Pogonodon davisi	190	20.21	89.11	134	?	?	?	?	?	9.83	10.57	?	?	?	?	?
AMNH 62124	Pogonodon davisi	184	12.77	76.39	?	40.22	138.11	15.56	10.3	?	12.4	13.63	?	?	?	?	?
FAM 102155	Pogonodon davisi	180	?	?	148	41.58	147	?	?	2.7	9.93	11.27	?	?	?	?	?
FAM 62026	Pogonodon davisi	191	16.95	93.28	147	49.85	160	?	?	?	10.29	12.75	18.9	22.82	?	?	?
FAM 62019	Pogonodon davisi	190	?	?	?	?	?	?	?	?	?	?	19.36	23.01	?	?	?
FAM 62042	Pogonodon davisi	198	?	?	148	47.31	157	20.1	12.19	?	14.6	17.8	17.68	22.22	?	?	?
AMNH 1403	Pogonodon davisi	169	15.5	87.06	?	?	?	?	?	?	8.96	12.88	?	?	?	?	?
LUSK 309-2729	Pogonodon davisi	?	?	?	?	?	?	?	?	2.7	?	?	?	?	?	220	267
AMNH 6938*	Pogonodon platycopis	215	17.67	99.11	164	54.36	183	23.64	13.61	2.2	11.71	15.4	20.52	24.42	?	?	?
UNSM 2509-59	Pogonodon platycopis	?	?	?	?	?	?	?	?	?	?	?	21.64	25.76	?	?	?
