# Supplementary material for: Taxonomic and systematic revisions to the North American Nimravidae (Mammalia, Carnivora)
Source: PeerJ. 2016 Feb 9;4:e1658. doi: 10.7717/peerj.1658 (PMC4756750; doi:10.7717/peerj.1658)
Supplement: Supplemental Information 4 [file peerj-04-1658-s004.xlsx]

## Sheet: Sheet1
Dinictis	2 groups
Coefficients of linear discriminants:
LD1
Cranial.Length..mm. 0.26036267
Post.Canine.Diastema.Length..mm. -1.48510244
Palate.Length..mm. -0.08000302
Lamboid.Crest.Angle.... 0.15147199
Genial.Flange.Height..mm. 0.53198137
Mandible.Length..mm. -0.20493516
P3.Height..mm. -2.07848260
P4.Height..mm. 0.40378846
Trigonid.Length..mm. 1.92717660
m1.Length..mm. -0.05011572
Pogonodon		2 groups
Coefficients of linear discriminants:
LD1
Genial.Flange.Height..mm. -0.80748792
Mandible.Length..mm. 0.03888659
Trigonid.Length..mm. -2.07719166
m1.Length..mm. 6.61209637
Nimravus		2 groups
Coefficients of linear discriminants:
LD1
Cranial.Length..mm. 0.01659515
Post.Canine.Diastema.Length..mm. 0.05800000
Palate.Length..mm. -0.04164073
Lambdoid.Crest.Angle.... 0.78573967
Canine.Length..mm. 0.18733972
Canine.Width..mm. 0.30887266
P3.Height..mm. -0.30499186
P4.Height..mm. -0.19681315
Trigonid.Length..mm. 0.15656929
m1.Length..mm. -0.06661491
Hoplophoneus		3 groups
Coefficients of linear discriminants:
LD1 LD2
Cranial.Length..mm. -0.8936033 2.5344550
Post.Canine.Diastema.Length..mm. 1.6425835 -3.9266114
Palate.Length..mm. 1.1317499 -2.9279575
Lamboid.Crest.Angle.... 0.3759741 -0.9774817
Genial.Flange.Height..mm. 1.9507952 -5.5949783
Mandible.Length..mm. -0.3344137 0.4083378
Canine.Length..mm. -3.0602073 9.1214364
Canine.Width..mm. -2.5869018 6.6478988
P3.Height..mm. 9.7941359 -25.1140366
P4.Height..mm. -0.3133577 0.8407123
Trigonid.Length..mm. 3.6563052 -11.9059060
m1.Length..mm. -7.3207711 20.4192075
